# Supplementary material for: Machine Learning Analysis of Alzheimer’s Disease Single-Cell RNA-Sequencing Data across Cortex and Hippocampus Regions
Source: MDPI journal article supplement (doi:10.3390/cimb45110544), 2023-10-28

## Supplementary Material

### Machine Learning of Alzheimer's Disease single cell RNA-sequencing data across Cortex and Hippocampus Regions

Marios G. Krokidis\*, Aristidis G. Vrahatis, Konstantinos Lazaros, Konstantina Skolariki, Themis P. Exarchos and Panagiotis Vlamos

\*Correspondence: mkrokidis@ionio.gr

**Table S1.** The top 10 enriched Reactome pathways for DEGs in cortex

| Index | Name                                                                                           | P-value  | Adjusted p-value | Odds Ratio | Combined score |
|-------|------------------------------------------------------------------------------------------------|----------|------------------|------------|----------------|
| 1     | Abacavir Transmembrane Transport R-HSA-2161517                                                 | 0.02475  | 0.3024           | 50.24      | 185.84         |
| 2     | Synthesis Of GDP-mannose R-HSA-446205                                                          | 0.02475  | 0.3024           | 50.24      | 185.84         |
| 3     | G2 Phase R-HSA-68911                                                                           | 0.02475  | 0.3024           | 50.24      | 185.84         |
| 4     | RUNX2 Regulates Chondrocyte Maturation R-HSA-8941284                                           | 0.02475  | 0.3024           | 50.24      | 185.84         |
| 5     | Extrinsic Pathway Of Fibrin Clot Formation R-HSA-140834                                        | 0.02475  | 0.3024           | 50.24      | 185.84         |
| 6     | Metabolism Of Amine-Derived Hormones R-HSA-209776                                              | 0.003594 | 0.2379           | 25.36      | 142.75         |
| 7     | FLT3 Signaling Thru SRC Family Kinases R-HSA-9706374                                           | 0.02963  | 0.3024           | 40.19      | 141.43         |
| 8     | PTK6 Regulates Cell Cycle R-HSA-8849470                                                        | 0.02963  | 0.3024           | 40.19      | 141.43         |
| 9     | GLI Proteins Bind Promoters Of Hh Responsive Genes To Promote Transcription R-HSA-5635851      | 0.03448  | 0.3024           | 33.49      | 112.77         |
| 10    | Insulin-like Growth Factor-2 mRNA Binding Proteins (IGF2BPs/IMPs/VICKZs) Bind RNA R-HSA-428359 | 0.03448  | 0.3024           | 33.49      | 112.77         |

**Table S2.** The top 10 enriched biological processes for DEGs in cortex

| Index | Name                                          | P-value   | Adjusted p-value | Odds Ratio | Combined score |
|-------|-----------------------------------------------|-----------|------------------|------------|----------------|
| 1     | L-alanine Transport (GO:0015808)              | 0.0005113 | 0.08230          | 81.20      | 615.40         |
| 2     | Osteoblast Development (GO:0002076)           | 0.0005113 | 0.08230          | 81.20      | 615.40         |
| 3     | Embryonic Eye Morphogenesis (GO:0048048)      | 0.0008709 | 0.08230          | 58.00      | 408.65         |
| 4     | Mesoderm Development (GO:0007498)             | 0.0001109 | 0.07252          | 38.44      | 350.03         |
| 5     | Glycine Transport (GO:0015816)                | 0.001085  | 0.08230          | 50.74      | 346.39         |
| 6     | T Cell Chemotaxis (GO:0010818)                | 0.001085  | 0.08230          | 50.74      | 346.39         |
| 7     | Response To Nitric Oxide (GO:0071731)         | 0.001322  | 0.08230          | 45.10      | 298.98         |
| 8     | Regulation Of T Cell Chemotaxis (GO:0010819)  | 0.001862  | 0.1009           | 36.90      | 231.95         |
| 9     | L-amino Acid Transport (GO:0015807)           | 0.0002900 | 0.08230          | 26.73      | 217.71         |
| 10    | Thiamine Transmembrane Transport (GO:0071934) | 0.02475   | 0.2032           | 50.24      | 185.84         |

**Table S3.** The top 10 enriched molecular functions for DEGs in cortex

| Index | Name                                                                           | P-value   | Adjusted p-value | Odds Ratio | Combined score |
|-------|--------------------------------------------------------------------------------|-----------|------------------|------------|----------------|
| 1     | Glycine Transmembrane Transporter Activity (GO:0015187)                        | 0.0008709 | 0.06663          | 58.00      | 408.65         |
| 2     | Alanine Transmembrane Transporter Activity (GO:0022858)                        | 0.002166  | 0.07319          | 33.82      | 207.50         |
| 3     | Oxidoreductase Activity, Acting On Metal Ions, Oxygen As Acceptor (GO:0016724) | 0.02475   | 0.1317           | 50.24      | 185.84         |
| 4     | Thiamine Transmembrane Transporter Activity (GO:0015234)                       | 0.02475   | 0.1317           | 50.24      | 185.84         |
| 5     | ATP-activated Inward Rectifier Potassium Channel Activity (GO:0015272)         | 0.02475   | 0.1317           | 50.24      | 185.84         |
| 6     | Amino Acid:Proton Symporter Activity (GO:0005280)                              | 0.02475   | 0.1317           | 50.24      | 185.84         |
| 7     | N,N-dimethylaniline Monooxygenase Activity (GO:0004499)                        | 0.02475   | 0.1317           | 50.24      | 185.84         |
| 8     | Acetylcholine Receptor Inhibitor Activity (GO:0030550)                         | 0.02475   | 0.1317           | 50.24      | 185.84         |
| 9     | Ferroxidase Activity (GO:0004322)                                              | 0.02475   | 0.1317           | 50.24      | 185.84         |
| 10    | Basic Amino Acid Transmembrane Transporter Activity (GO:0015174)               | 0.003205  | 0.07319          | 27.05      | 155.37         |

**Table S4.** The top 10 enriched cellular components for DEGs in cortex

| Index | Name                                               | P-value  | Adjusted<br>p-value | Odds<br>Ratio | Combined<br>score |
|-------|----------------------------------------------------|----------|---------------------|---------------|-------------------|
| 1     | Smooth Endoplasmic Reticulum (GO:0005790)          | 0.004004 | 0.3604              | 23.87         | 131.77            |
| 2     | HFE-transferrin Receptor Complex (GO:1990712)      | 0.03448  | 0.3954              | 33.49         | 112.77            |
| 3     | Microfibril (GO:0001527)                           | 0.05366  | 0.3954              | 20.09         | 58.77             |
| 4     | Platelet Dense Granule Lumen (GO:0031089)          | 0.06310  | 0.3954              | 16.74         | 46.25             |
| 5     | Cation-Transporting ATPase Complex (GO:0090533)    | 0.07246  | 0.3954              | 14.35         | 37.66             |
| 6     | Chitosome (GO:0045009)                             | 0.07246  | 0.3954              | 14.35         | 37.66             |
| 7     | Melanosome Membrane (GO:0033162)                   | 0.07246  | 0.3954              | 14.35         | 37.66             |
| 8     | trans-Golgi Network Transport Vesicle (GO:0030140) | 0.07246  | 0.3954              | 14.35         | 37.66             |
| 9     | Pigment Granule Membrane (GO:0090741)              | 0.07246  | 0.3954              | 14.35         | 37.66             |
| 10    | Protein Kinase Complex (GO:1902911)                | 0.08171  | 0.4086              | 12.55         | 31.44             |

**Table S5.** The top 10 enriched Reactome pathways for DEGs in hippocampus.

| Index | Name                                                                       | P-value  | Adjusted<br>p-value | Odds<br>Ratio | Combined<br>score |
|-------|----------------------------------------------------------------------------|----------|---------------------|---------------|-------------------|
| 1     | Synthesis Of Lipoxins (LX) R-HSA-2142700                                   | 0.02963  | 0.4184              | 40.19         | 141.43            |
| 2     | Choline Catabolism R-HSA-6798163                                           | 0.02963  | 0.4184              | 40.19         | 141.43            |
| 3     | Vitamin C (Ascorbate) Metabolism R-HSA-196836                              | 0.03448  | 0.4184              | 33.49         | 112.77            |
| 4     | MECP2 Regulates Transcription Of Neuronal Ligands R-HSA-9022702            | 0.03448  | 0.4184              | 33.49         | 112.77            |
| 5     | Kinesins R-HSA-983189                                                      | 0.001209 | 0.2550              | 15.75         | 105.81            |
| 6     | Fatty Acids Bound To GPR40 (FFAR1) Regulate Insulin Secretion R-HSA-434316 | 0.03931  | 0.4184              | 28.71         | 92.90             |
| 7     | Synthesis Of 5-Eicosatetraenoic Acids R-HSA-2142688                        | 0.04412  | 0.4184              | 25.12         | 78.38             |
| 8     | CD163 Mediating An Anti-Inflammatory Response R-HSA-9662834                | 0.04412  | 0.4184              | 25.12         | 78.38             |
| 9     | Acetylcholine Regulates Insulin Secretion R-HSA-399997                     | 0.04890  | 0.4184              | 22.32         | 67.37             |
| 10    | Calcitonin-like Ligand Receptors R-HSA-419812                              | 0.04890  | 0.4184              | 22.32         | 67.37             |

**Table S6.** The top 10 enriched biological processes for DEGs in hippocampus.

| Index | Name                                                        | P-value   | Adjusted p-value | Odds Ratio | Combined score |
|-------|-------------------------------------------------------------|-----------|------------------|------------|----------------|
| 1     | Kinetochore Organization (GO:0051383)                       | 0.001085  | 0.2213           | 50.74      | 346.39         |
| 2     | Negative Regulation Of Cation Channel Activity (GO:2001258) | 0.0003628 | 0.1480           | 24.59      | 194.77         |
| 3     | Regulation Of Epinephrine Secretion (GO:0014060)            | 0.02475   | 0.2707           | 50.24      | 185.84         |
| 4     | ISG15-protein Conjugation (GO:0032020)                      | 0.02475   | 0.2707           | 50.24      | 185.84         |
| 5     | L-ascorbic Acid Metabolic Process (GO:0019852)              | 0.02475   | 0.2707           | 50.24      | 185.84         |
| 6     | Glomerular Epithelial Cell Differentiation (GO:0072311)     | 0.02475   | 0.2707           | 50.24      | 185.84         |
| 7     | Positive Regulation Of Mitotic Cytokinesis (GO:1903490)     | 0.02475   | 0.2707           | 50.24      | 185.84         |
| 8     | Regulation Of Glucagon Secretion (GO:0070092)               | 0.02475   | 0.2707           | 50.24      | 185.84         |
| 9     | Regulation Of Guanylate Cyclase Activity (GO:0031282)       | 0.02475   | 0.2707           | 50.24      | 185.84         |
| 10    | Positive Regulation Of Receptor Binding (GO:1900122)        | 0.02475   | 0.2707           | 50.24      | 185.84         |

**Table S7.** The top 10 enriched molecular functions for DEGs in hippocampus.

| Index | Name                                                               | P-value  | Adjusted p-value | Odds Ratio | Combined score |
|-------|--------------------------------------------------------------------|----------|------------------|------------|----------------|
| 1     | Galactosidase Activity (GO:0015925)                                | 0.02963  | 0.4260           | 40.19      | 141.43         |
| 2     | Guanylate Cyclase Activator Activity (GO:0030250)                  | 0.02963  | 0.4260           | 40.19      | 141.43         |
| 3     | Tubulin-Glutamic Acid Ligase Activity (GO:0070740)                 | 0.03931  | 0.4260           | 28.71      | 92.90          |
| 4     | Neuropeptide Activity (GO:0160041)                                 | 0.007439 | 0.2350           | 16.90      | 82.83          |
| 5     | Neuropeptide Hormone Activity (GO:0005184)                         | 0.007439 | 0.2350           | 16.90      | 82.83          |
| 6     | Glutathione Transferase Activity (GO:0004364)                      | 0.008596 | 0.2350           | 15.60      | 74.20          |
| 7     | Myosin II Binding (GO:0045159)                                     | 0.04890  | 0.4260           | 22.32      | 67.37          |
| 8     | Phosphatidylinositol Phosphate 5-Phosphatase Activity (GO:0034595) | 0.05366  | 0.4260           | 20.09      | 58.77          |
| 9     | 5'-Nucleotidase Activity (GO:0008253)                              | 0.05839  | 0.4260           | 18.26      | 51.88          |
| 10    | Aldehyde Dehydrogenase (NAD+) Activity (GO:0004029)                | 0.06779  | 0.4260           | 15.45      | 41.59          |

**Table S8.** The top 10 enriched cellular components for DEGs in hippocampus

| Index | Name                                                    | P-value | Adjusted p-value | Odds Ratio | Combined score |
|-------|---------------------------------------------------------|---------|------------------|------------|----------------|
| 1     | Junctional Sarcoplasmic Reticulum Membrane (GO:0014701) | 0.03931 | 0.3445           | 28.71      | 92.90          |
| 2     | Condensed Chromosome, Centromeric Region (GO:0000779)   | 0.04412 | 0.3445           | 25.12      | 78.38          |
| 3     | Axonal Growth Cone (GO:0044295)                         | 0.07246 | 0.4150           | 14.35      | 37.66          |
| 4     | Cortical Actin Cytoskeleton (GO:0030864)                | 0.02043 | 0.3445           | 9.65       | 37.54          |
| 5     | Sarcoplasmic Reticulum (GO:0016529)                     | 0.02131 | 0.3445           | 9.42       | 36.27          |
| 6     | Kinetochore Microtubule (GO:0005828)                    | 0.08631 | 0.4404           | 11.81      | 28.94          |
| 7     | Tertiary Granule Lumen (GO:1904724)                     | 0.02891 | 0.3445           | 7.94       | 28.15          |

| Index | Name                                          | P-value | Adjusted p-value | Odds Ratio | Combined score |
|-------|-----------------------------------------------|---------|------------------|------------|----------------|
| 8     | AMPA Glutamate Receptor Complex (GO:0032281)  | 0.09088 | 0.4404           | 11.16      | 26.76          |
| 9     | Mitochondrial Ribosome (GO:0005761)           | 0.1045  | 0.4537           | 9.56       | 21.60          |
| 10    | Heterotrimeric G-protein Complex (GO:0005834) | 0.1134  | 0.4537           | 8.73       | 19.00          |

**Table S9.** The top 10 enriched Reactome pathways for DEGs in cortex compared to hippocampus.

| Index | Name                                                                     | P-value  | Adjusted p-value | Odds Ratio | Combined score |
|-------|--------------------------------------------------------------------------|----------|------------------|------------|----------------|
| 1     | Signaling By Membrane-Tethered Fusions Of PDGFRA Or PDGFRB R-HSA-9673768 | 0.02475  | 0.2175           | 50.24      | 185.84         |
| 2     | PTK6 Expression R-HSA-8849473                                            | 0.02475  | 0.2175           | 50.24      | 185.84         |
| 3     | Tachykinin Receptors Bind Tachykinins R-HSA-380095                       | 0.02475  | 0.2175           | 50.24      | 185.84         |
| 4     | Muscarinic Acetylcholine Receptors R-HSA-390648                          | 0.02475  | 0.2175           | 50.24      | 185.84         |
| 5     | Dopamine Receptors R-HSA-390651                                          | 0.02475  | 0.2175           | 50.24      | 185.84         |
| 6     | NGF-independant TRKA Activation R-HSA-187024                             | 0.02475  | 0.2175           | 50.24      | 185.84         |
| 7     | Synthesis Of Lipoxins (LX) R-HSA-2142700                                 | 0.02963  | 0.2175           | 40.19      | 141.43         |
| 8     | PTK6 Promotes HIF1A Stabilization R-HSA-8857538                          | 0.02963  | 0.2175           | 40.19      | 141.43         |
| 9     | Activation Of TRKA Receptors R-HSA-187015                                | 0.02963  | 0.2175           | 40.19      | 141.43         |
| 10    | Defective B3GALT6 Causes EDSP2 And SEMDJL1 R-HSA-4420332                 | 0.004434 | 0.1256           | 22.54      | 122.14         |

**Table S10.** The top 10 enriched biological processes for DEGs in cortex compared to hippocampus.

| Index | Name                                                                            | P-value   | Adjusted p-value | Odds Ratio | Combined score |
|-------|---------------------------------------------------------------------------------|-----------|------------------|------------|----------------|
| 1     | Negative Regulation Of Cardiocyte Differentiation (GO:1905208)                  | 0.0003664 | 0.05163          | 101.51     | 803.12         |
| 2     | Adenylate Cyclase-Activating Adrenergic Receptor Signaling Pathway (GO:0071880) | 0.002491  | 0.1386           | 31.22      | 187.17         |
| 3     | Positive Regulation Of Gap Junction Assembly (GO:1903598)                       | 0.02475   | 0.2387           | 50.24      | 185.84         |
| 4     | ERBB2-EGFR Signaling Pathway (GO:0038134)                                       | 0.02475   | 0.2387           | 50.24      | 185.84         |
| 5     | Regulation Of Epinephrine Secretion (GO:0014060)                                | 0.02475   | 0.2387           | 50.24      | 185.84         |
| 6     | Regulation Of Establishment Of T Cell Polarity (GO:1903903)                     | 0.02475   | 0.2387           | 50.24      | 185.84         |
| 7     | Toll-Like Receptor 9 Signaling Pathway (GO:0034162)                             | 0.02475   | 0.2387           | 50.24      | 185.84         |
| 8     | Neurotransmitter Loading Into Synaptic Vesicle (GO:0098700)                     | 0.02475   | 0.2387           | 50.24      | 185.84         |
| 9     | Regulation Of Nitric Oxide Mediated Signal Transduction (GO:0010749)            | 0.02475   | 0.2387           | 50.24      | 185.84         |
| 10    | Prepulse Inhibition (GO:0060134)                                                | 0.02475   | 0.2387           | 50.24      | 185.84         |

**Table S11.** The top 10 enriched molecular functions for DEGs in cortex compared to hippocampus.

| Index | Name                                                                                             | P-value | Adjusted p-value | Odds Ratio | Combined score |
|-------|--------------------------------------------------------------------------------------------------|---------|------------------|------------|----------------|
| 1     | 1-Acylglycerophosphocholine O-acyltransferase Activity (GO:0047184)                              | 0.02475 | 0.2301           | 50.24      | 185.84         |
| 2     | Amino Acid:Proton Symporter Activity (GO:0005280)                                                | 0.02475 | 0.2301           | 50.24      | 185.84         |
| 3     | Phospholipase D Activity (GO:0004630)                                                            | 0.02475 | 0.2301           | 50.24      | 185.84         |
| 4     | Coreceptor Activity Involved In Wnt Signaling Pathway, Planar Cell Polarity Pathway (GO:1904929) | 0.02475 | 0.2301           | 50.24      | 185.84         |
| 5     | Secondary Active Monocarboxylate Transmembrane Transporter Activity (GO:0015355)                 | 0.02475 | 0.2301           | 50.24      | 185.84         |
| 6     | G Protein-Coupled Acetylcholine Receptor Activity (GO:0016907)                                   | 0.02963 | 0.2301           | 40.19      | 141.43         |
| 7     | G Protein-Coupled Neurotransmitter Receptor Activity (GO:0099528)                                | 0.02963 | 0.2301           | 40.19      | 141.43         |
| 8     | Nucleotide Transmembrane Transporter Activity (GO:0015215)                                       | 0.03448 | 0.2301           | 33.49      | 112.77         |
| 9     | 2-Acylglycerol-3-Phosphate O-acyltransferase Activity (GO:0047144)                               | 0.03448 | 0.2301           | 33.49      | 112.77         |
| 10    | Xylosyltransferase Activity (GO:0042285)                                                         | 0.03448 | 0.2301           | 33.49      | 112.77         |

**Table S12.** The top 10 enriched cellular components for DEGs in cortex compared to hippocampus.

| Index | Name                                                                              | P-value   | Adjusted p-value | Odds Ratio | Combined score |
|-------|-----------------------------------------------------------------------------------|-----------|------------------|------------|----------------|
| 1     | Perineuronal Net (GO:0072534)                                                     | 0.0006796 | 0.02242          | 67.67      | 493.57         |
| 2     | Perisynaptic Extracellular Matrix (GO:0098966)                                    | 0.0008709 | 0.02242          | 58.00      | 408.65         |
| 3     | Multivesicular Body, Internal Vesicle (GO:0097487)                                | 0.02475   | 0.1906           | 50.24      | 185.84         |
| 4     | Neuronal Dense Core Vesicle (GO:0098992)                                          | 0.02475   | 0.1906           | 50.24      | 185.84         |
| 5     | Ionotropic Glutamate Receptor Complex (GO:0008328)                                | 0.0005934 | 0.02242          | 20.48      | 152.19         |
| 6     | Chloride Channel Complex (GO:0034707)                                             | 0.02963   | 0.1906           | 40.19      | 141.43         |
| 7     | AMPA Glutamate Receptor Complex (GO:0032281)                                      | 0.004004  | 0.08248          | 23.87      | 131.77         |
| 8     | Clathrin-Sculpted Gamma-Aminobutyric Acid Transport Vesicle (GO:0061200)          | 0.03448   | 0.1906           | 33.49      | 112.77         |
| 9     | Clathrin-Sculpted Gamma-Aminobutyric Acid Transport Vesicle Membrane (GO:0061202) | 0.03448   | 0.1906           | 33.49      | 112.77         |
| 10    | AP-2 Adaptor Complex (GO:0030122)                                                 | 0.03931   | 0.1906           | 28.71      | 92.90          |

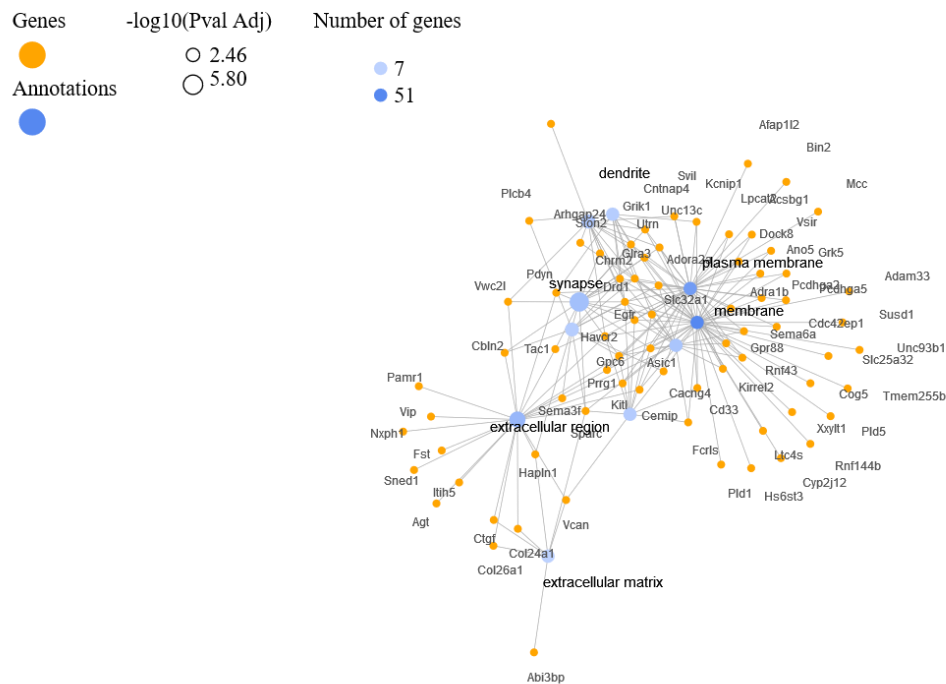

**Figure S1.** Gene-annotation cluster networks. Visualizations generated for 100 top terms in related categories with identified DEG list and gene-annotation cluster networks for GO cellular components.

**Figure S2.** Top 10 enriched biological processes for DEGs in 6-month-old cortex compared to 6-month-old hippocampus in control mice (datasets AD00301 and AD00702).

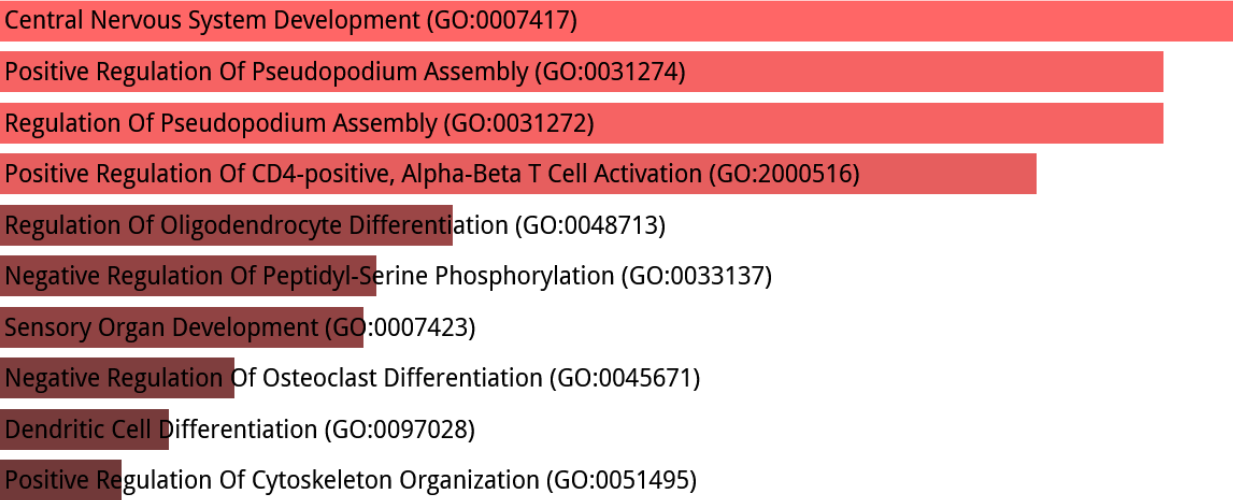

**Figure S3.** Top 10 enriched cellular components for DEGs in 6-month-old cortex compared to 6-month-old hippocampus in control mice (datasets AD00301 and AD00702).

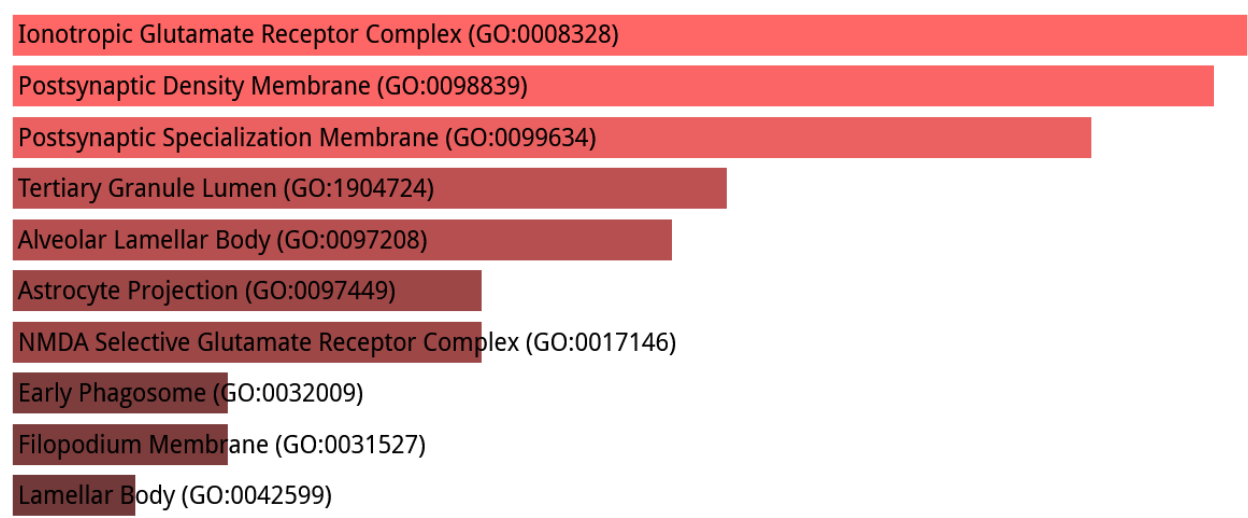

**Figure S4.** Top 10 enriched molecular functions for DEGs in 6-month-old cortex compared to 6-month-old hippocampus in control mice (datasets AD00301 and AD00702).

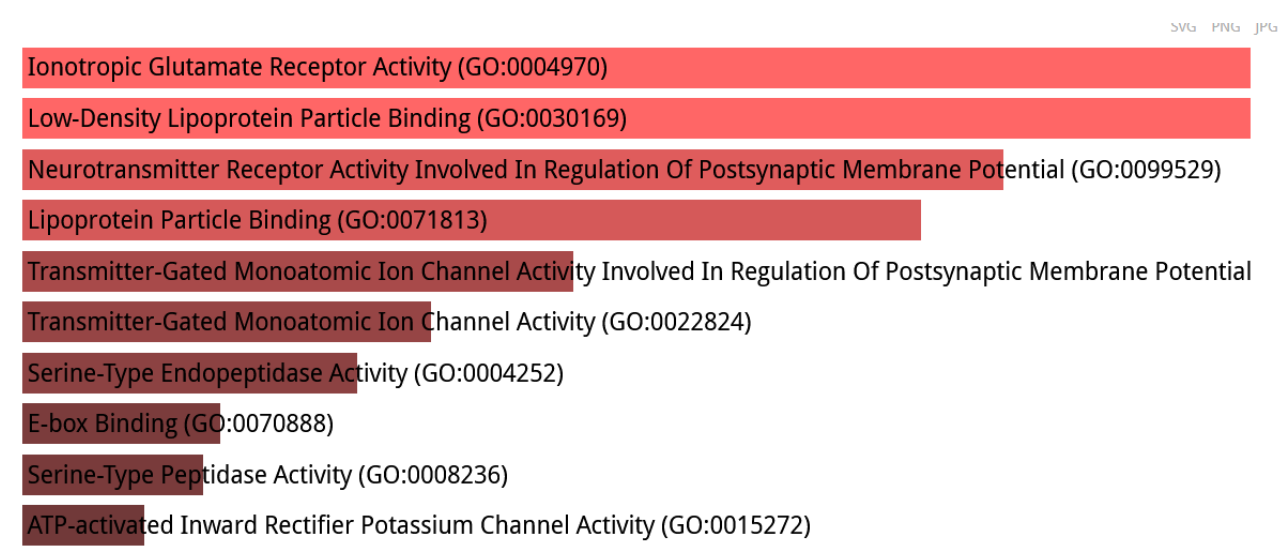



**Figure S5.** Top 10 enriched biological processes for DEGs in 6-month-old AD cortex compared to 7-month-old AD cortex (datasets AD00303 and AD00705).

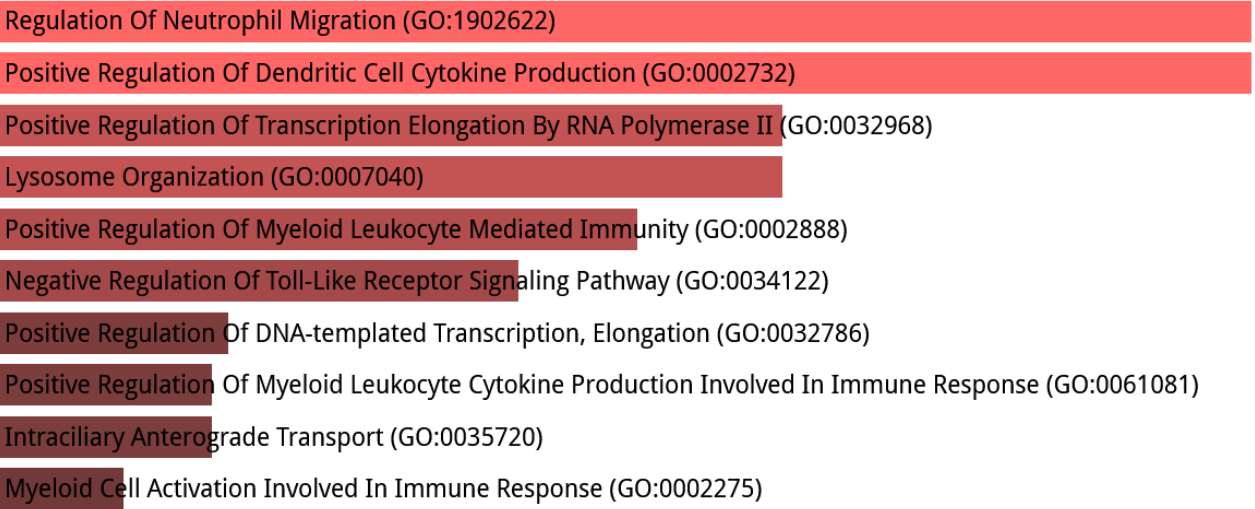

**Figure S6.** Top 10 enriched cellular components for DEGs in 6-month-old AD cortex compared to 7-month-old AD cortex (datasets AD00303 and AD00705).

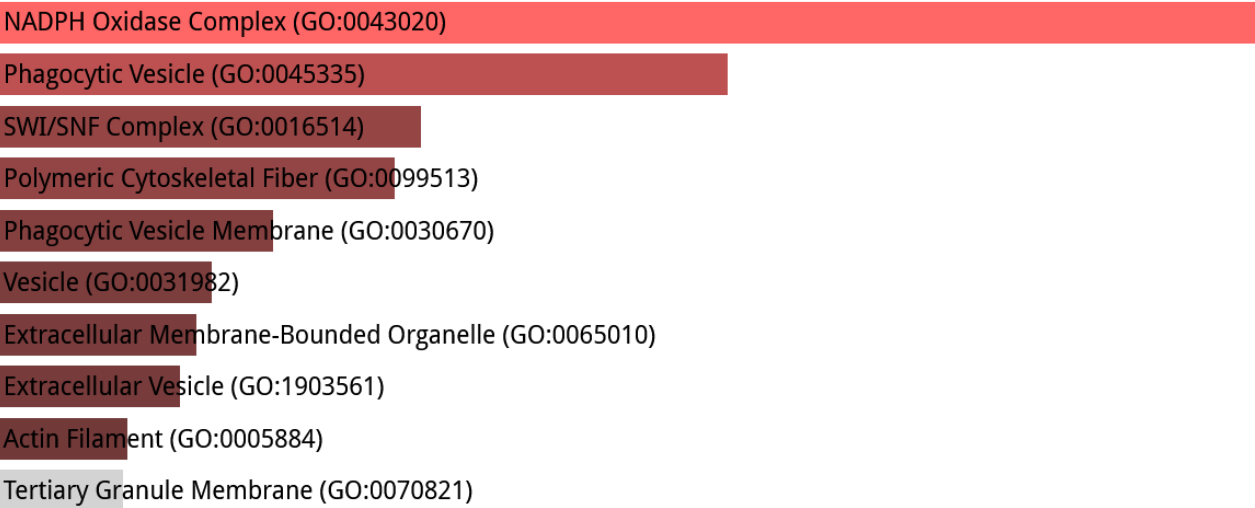

**Figure S7.** Top 10 enriched molecular functions for DEGs in 6-month-old AD cortex compared to 7-month-old AD cortex (datasets AD00303 and AD00705).

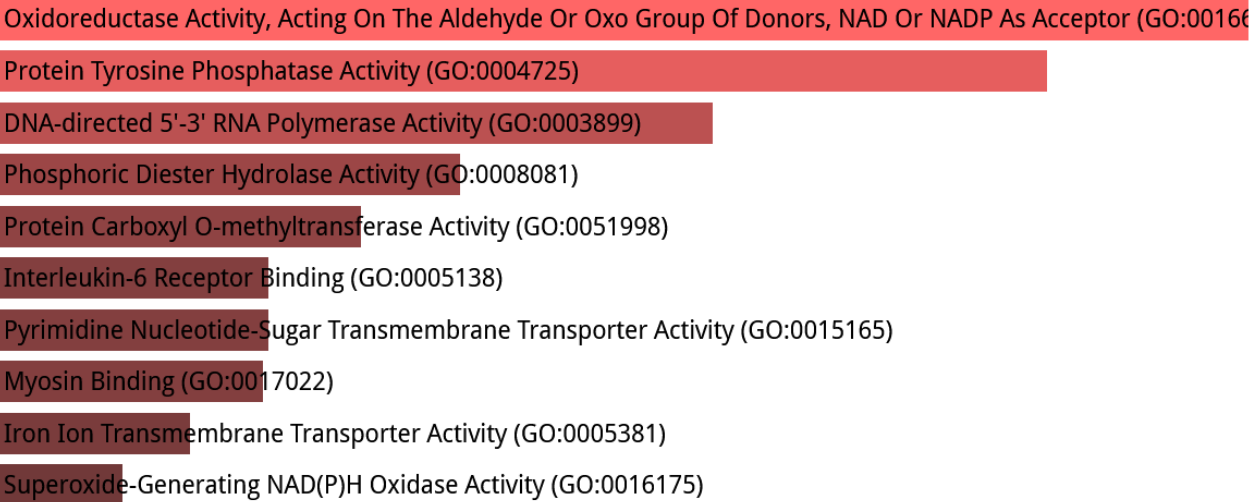

**Figure S8.** Top 10 enriched biological processes for DEGs in 15-month-old AD cortex compared to 15-month-old AD hippocampus (datasets AD00307 and AD00714).

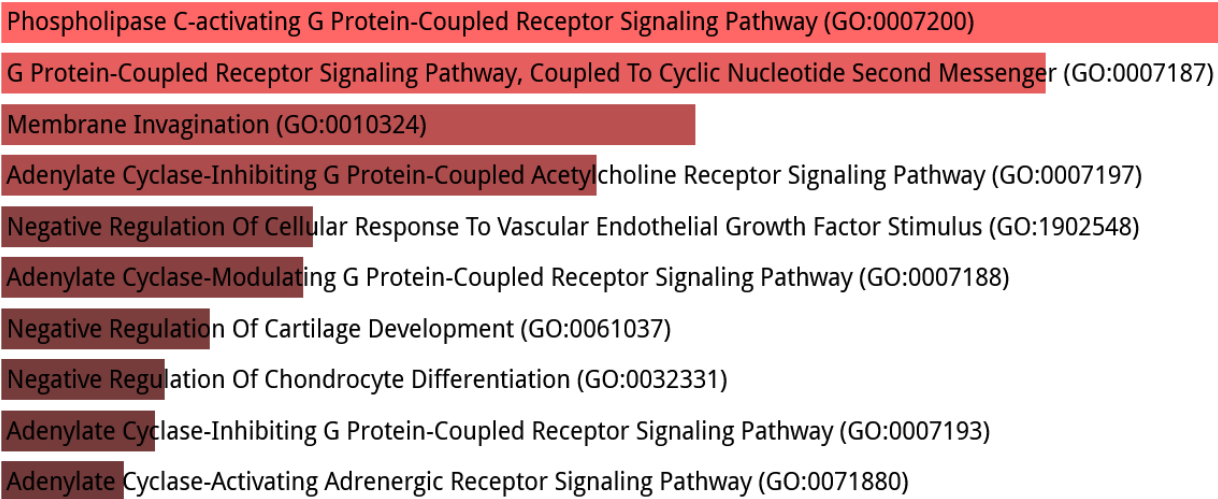

**Figure S9.** Top 10 enriched cellular components for DEGs in 15-month-old AD cortex compared to 15-month-old AD hippocampus (datasets AD00307 and AD00714).

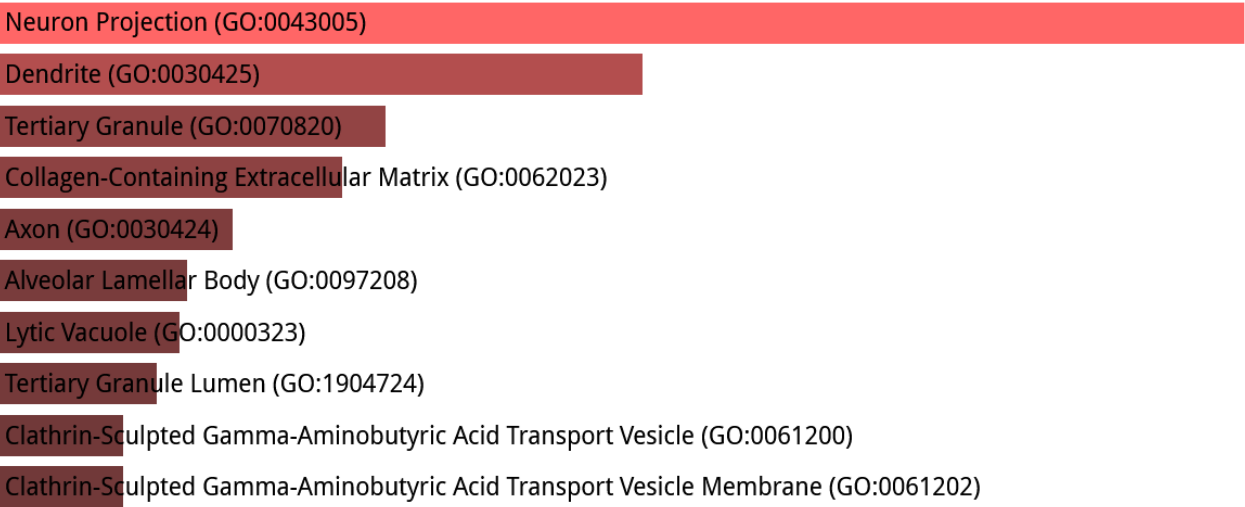

**Figure S10.** Top 10 enriched molecular functions for DEGs in 15-month-old AD cortex compared to 15-month-old AD hippocampus (datasets AD00307 and AD00714).

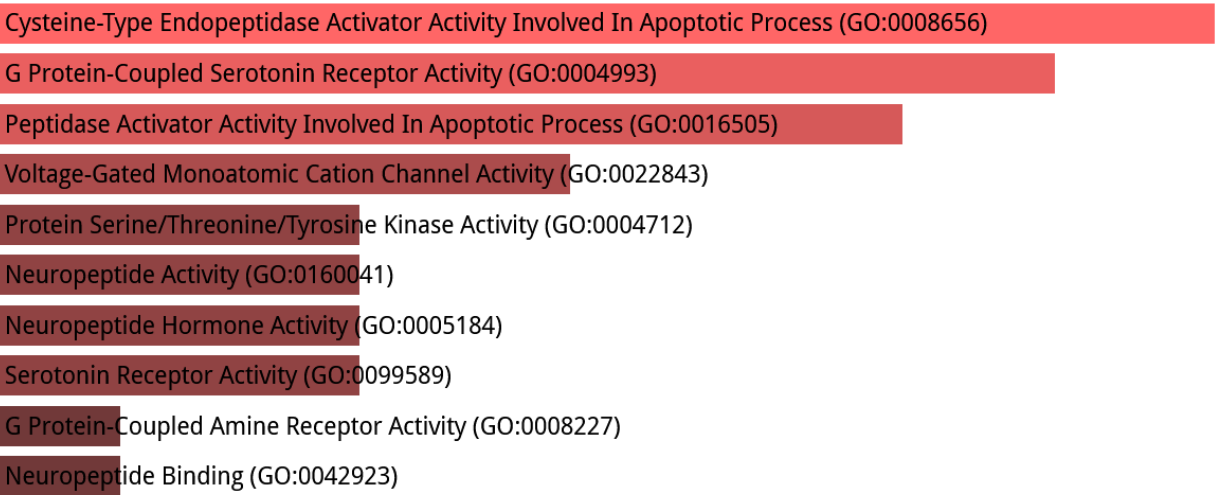

**Figure S11.** Top 10 enriched biological processes for DEGs in 15-month-old AD cortex compared to 15-month-old AD hippocampus (datasets AD00308 and AD00715).

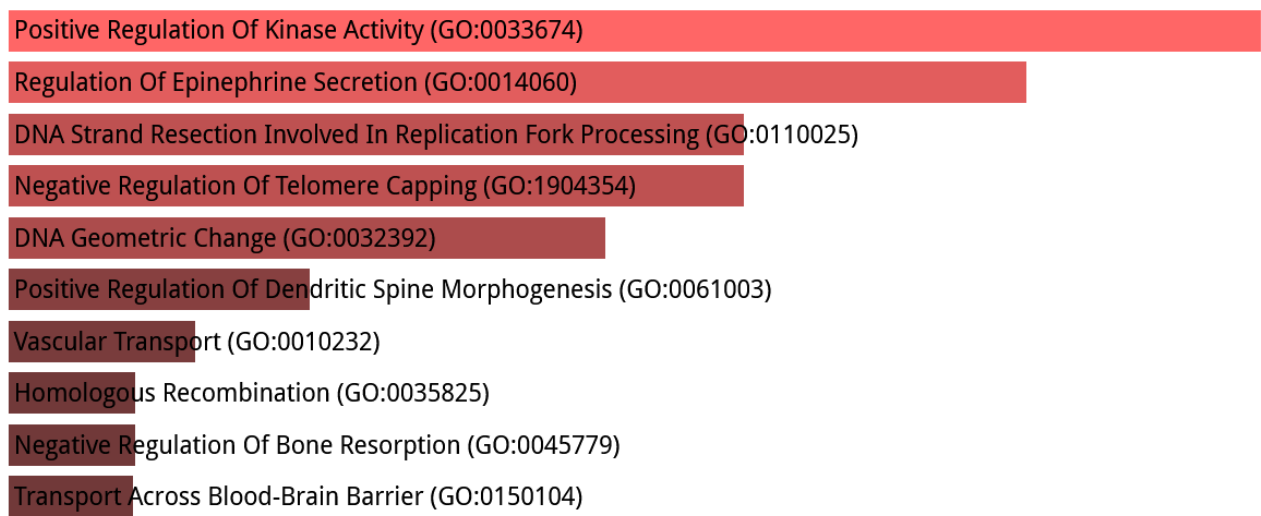

**Figure S12.** Top 10 enriched cellular components for DEGs in 15-month-old AD cortex compared to 15-month-old AD hippocampus (datasets AD00308 and AD00715).

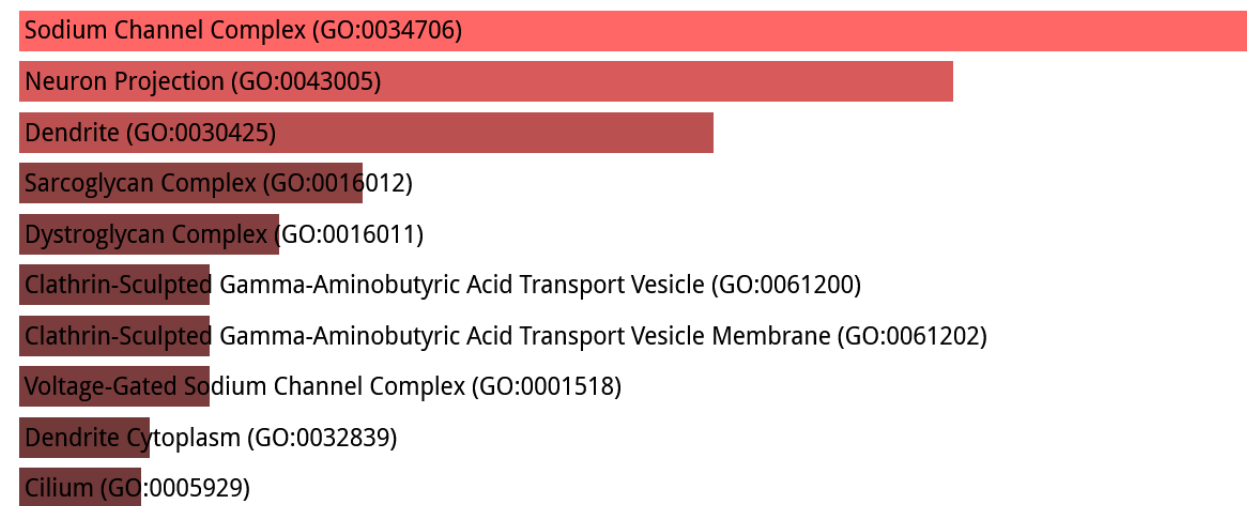

**Figure S13.** Top 10 enriched molecular functions for DEGs in 15-month-old AD cortex compared to 15-month-old AD hippocampus (datasets AD00308 and AD00715).

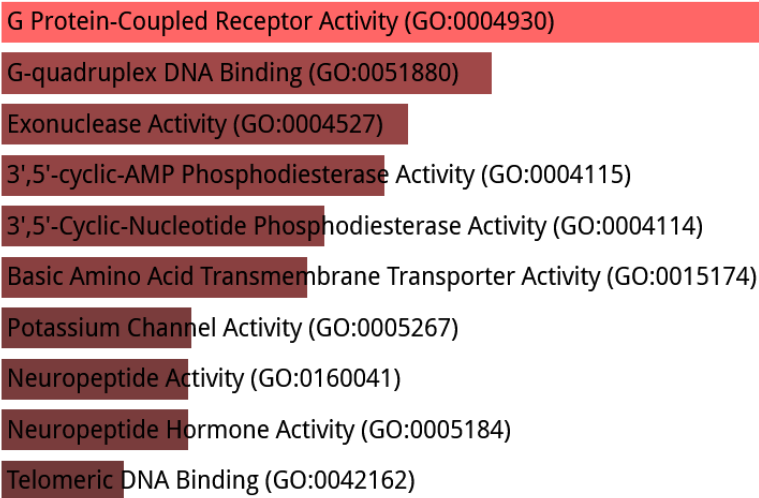

Supplement: s1 [file s1]
